# Supplementary material for: Non-catalytic allostery in α-TAT1 by a phospho-switch drives dynamic microtubule acetylation
Source: PubMed Central journal article supplement — J Cell Biol. 2022 Oct 12;221(11):e202202100. doi: 10.1083/jcb.202202100 (PMC9565784; doi:10.1083/jcb.202202100), 2022-10-12
Supplement: JCB_202202100_SourceDataF4.pdf [file JCB_202202100_SourceDataF4.pdf]

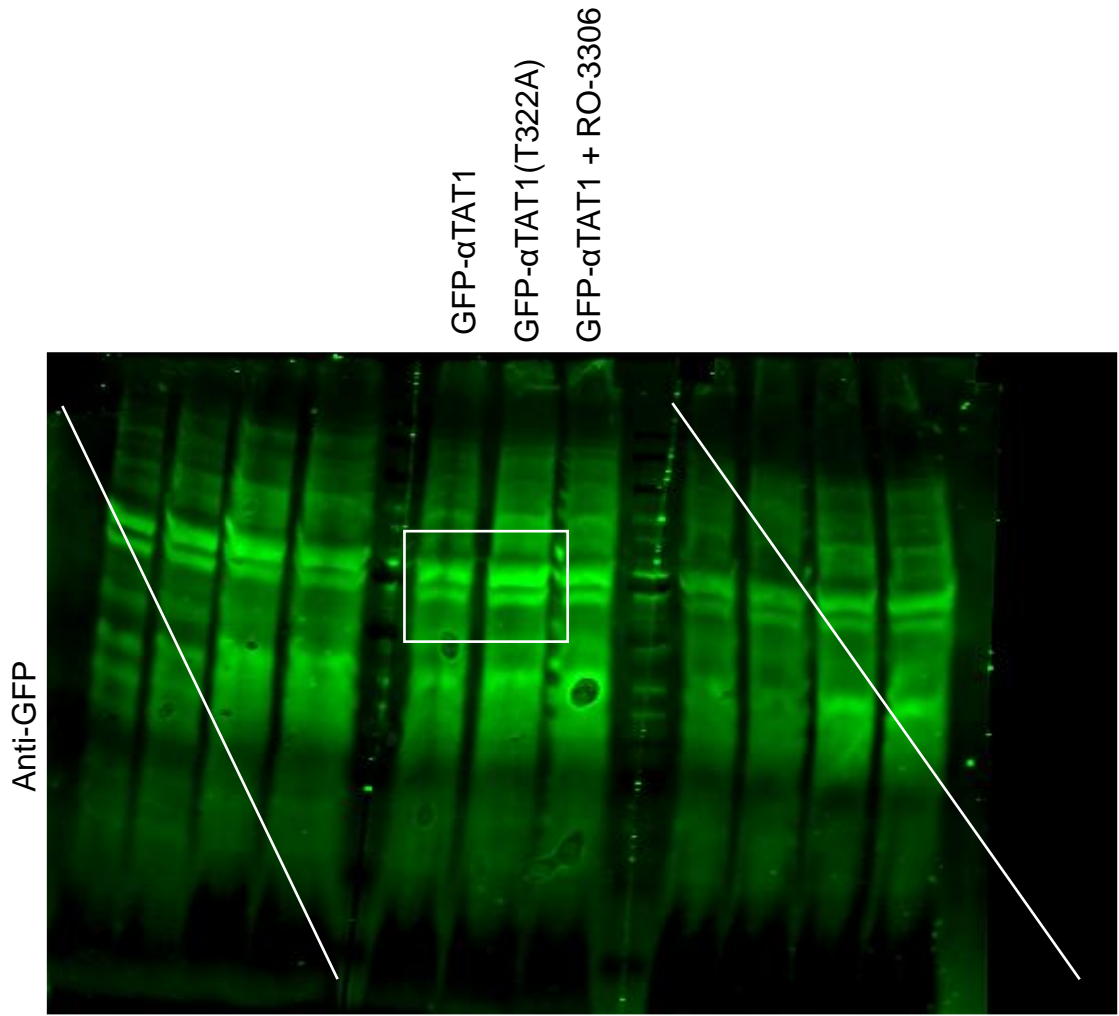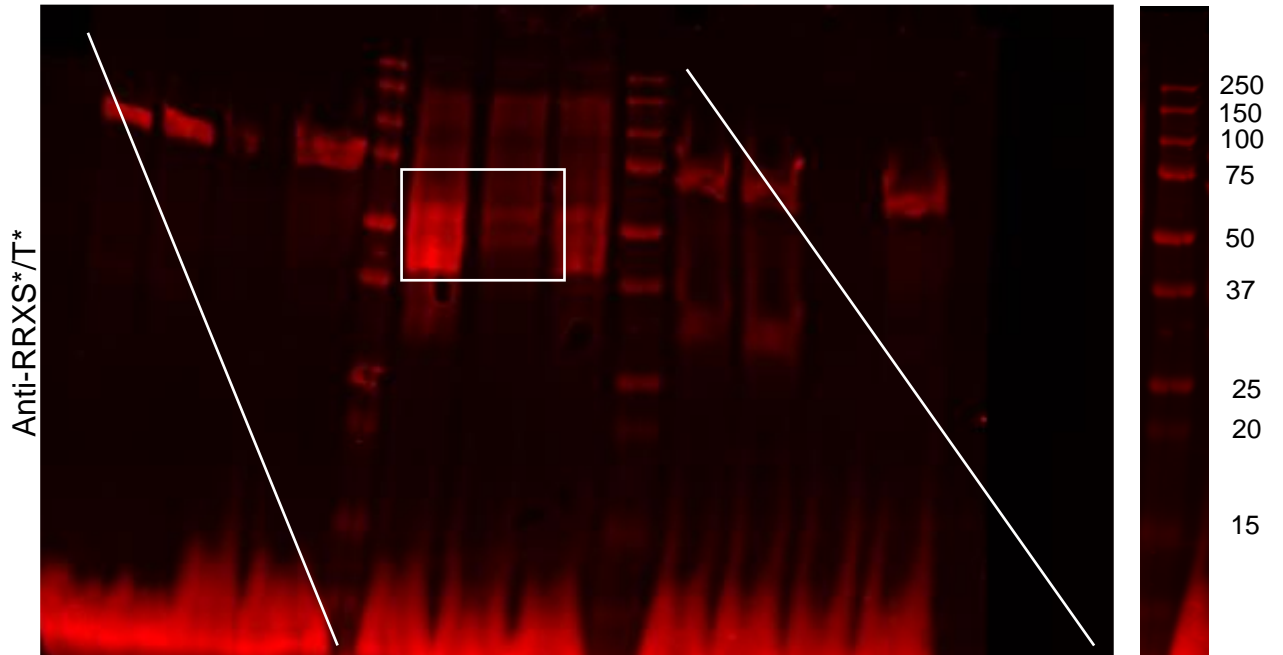

Full blot for Figure 4f. Parts of the blot used in Fig.4f are shown in white boxes.

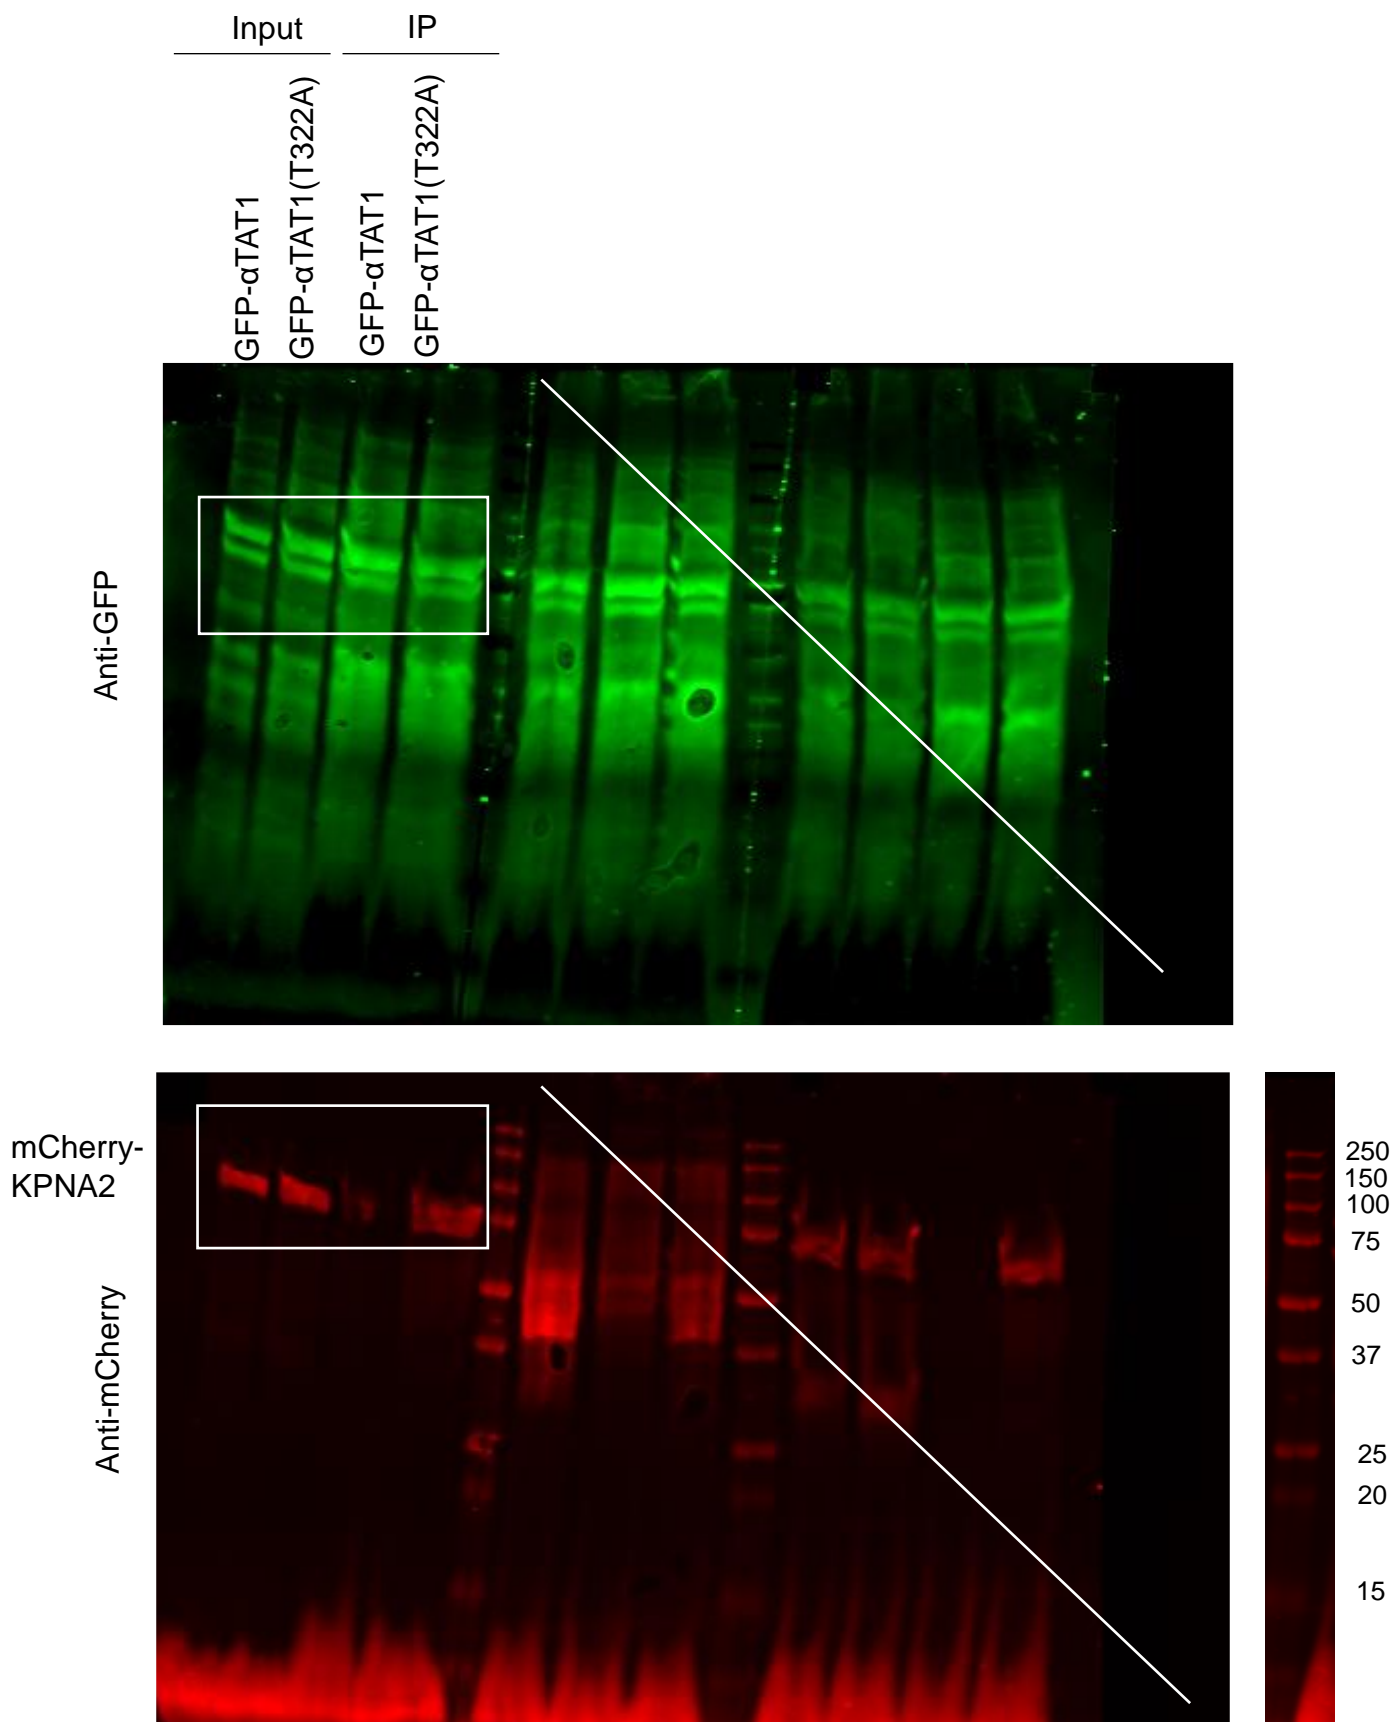

Full blot for Figure 4g. Parts of the blot used in Fig.4g are shown in white boxes.

← KO rescue →  
 WT   KO   mVenus   mVenus-αTAT1  
 mVenus-αTAT1   mVenus-αTAT1  
 αTAT1(ST/A)   (NES/A, ST/A)

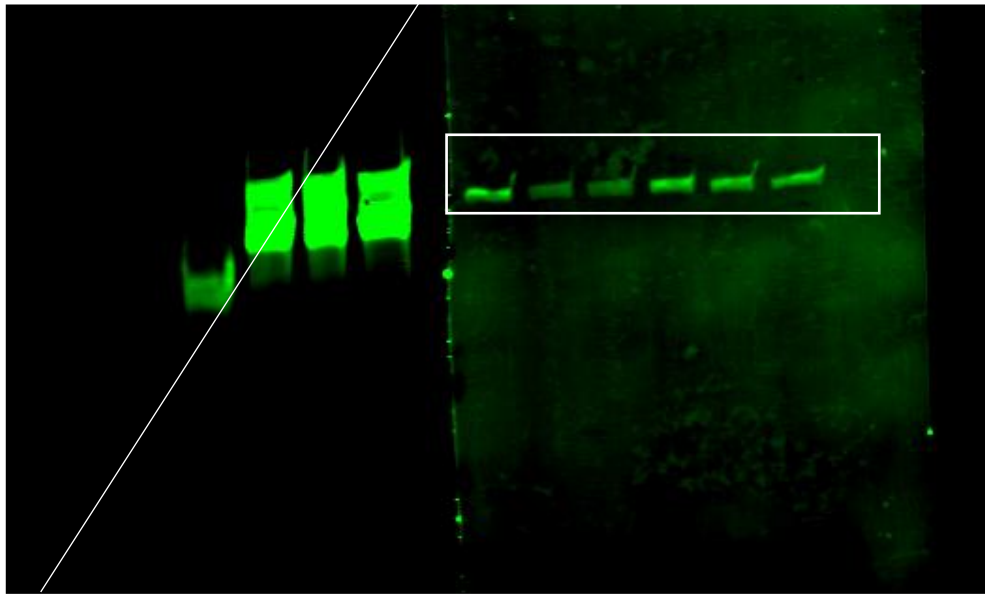

Anti acetylated K40

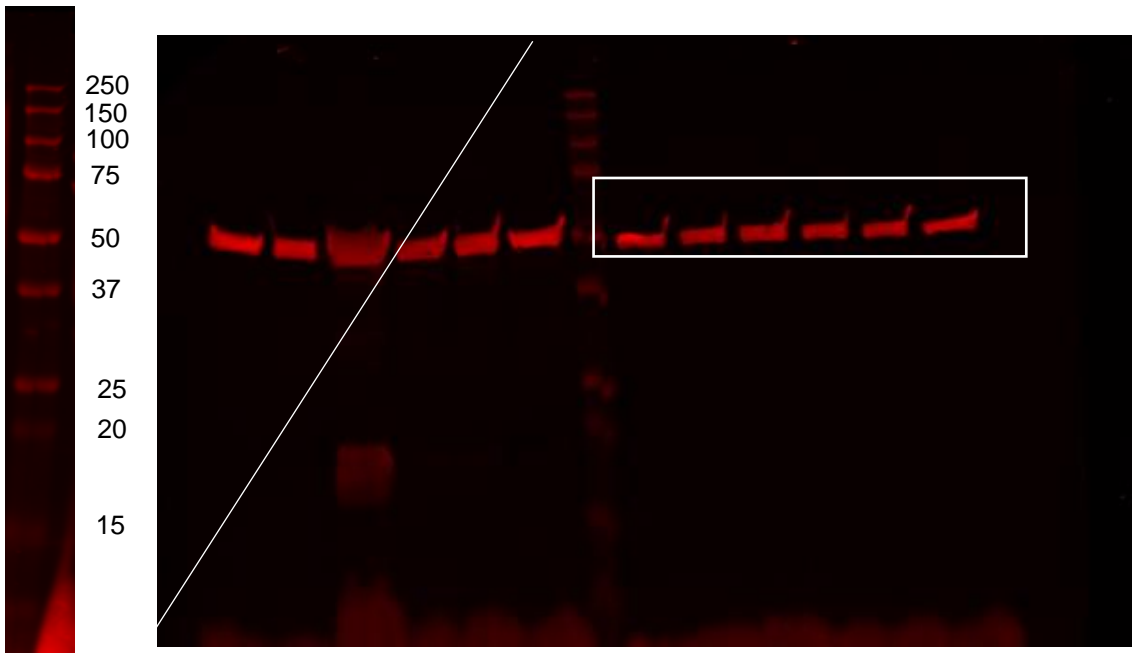

Anti α-Tubulin

Full blot for Figure 4k. Parts of the blot used in Fig.4k are shown in white boxes.
