# Supplementary material for: Non-catalytic allostery in α-TAT1 by a phospho-switch drives dynamic microtubule acetylation
Source: PubMed Central journal article supplement — J Cell Biol. 2022 Oct 12;221(11):e202202100. doi: 10.1083/jcb.202202100 (PMC9565784; doi:10.1083/jcb.202202100), 2022-10-12
Supplement: JCB_202202100_SourceDataF6.pdf [file JCB_202202100_SourceDataF6.pdf]

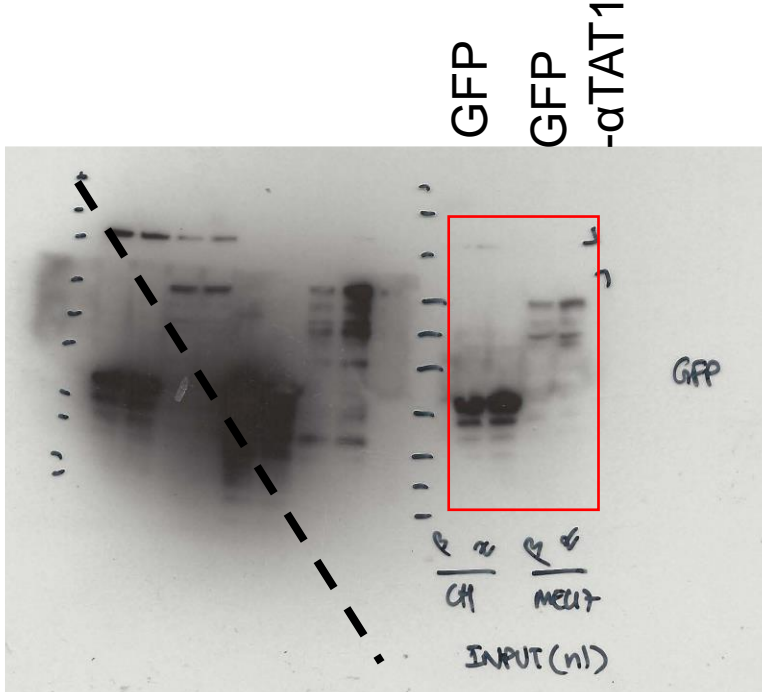

Input  
Anti-GFP  
(GFP and GFP- $\alpha$ TAT1,  
 $\alpha$ TAT1 is also  
called MEC17 in  
invertebrates)

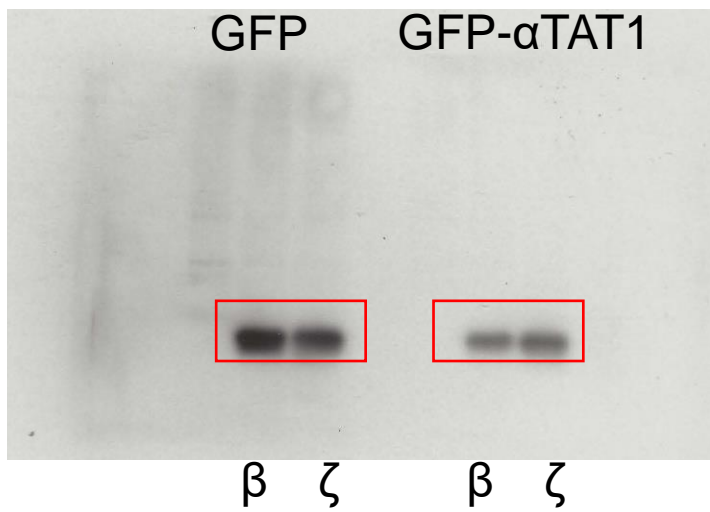

Input  
Anti-HA  
(HA-14-3-3- $\beta$  and  
HA-14-3-3- $\zeta$ )

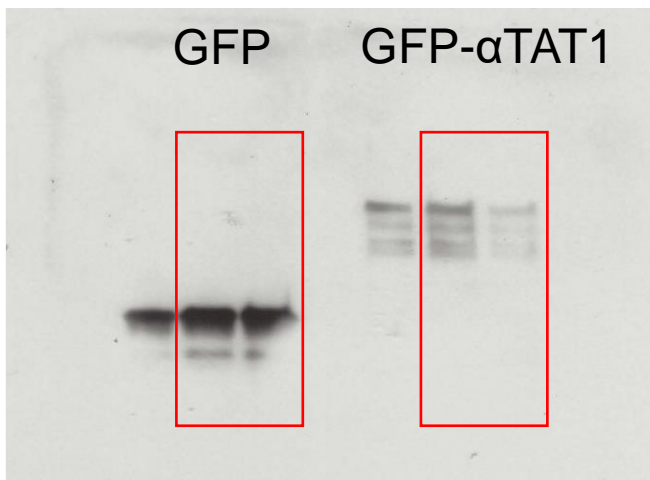

IP: Anti-GFP

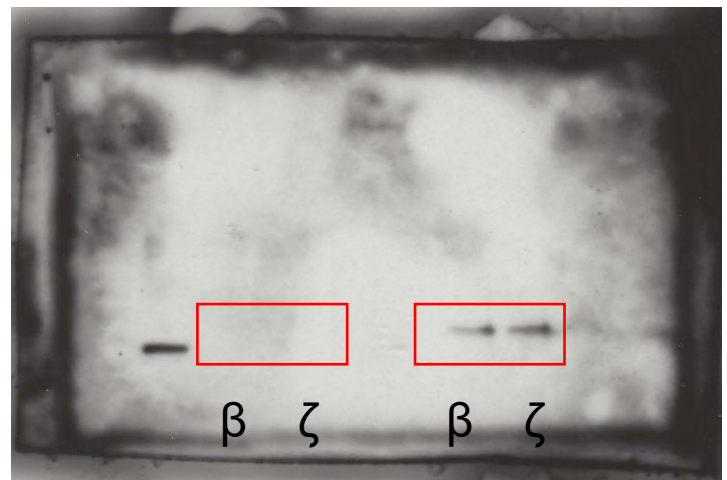

IP: Anti-HA

Full blot for Figure 6a. Parts of the blot used in Fig.6a are shown in red boxes.

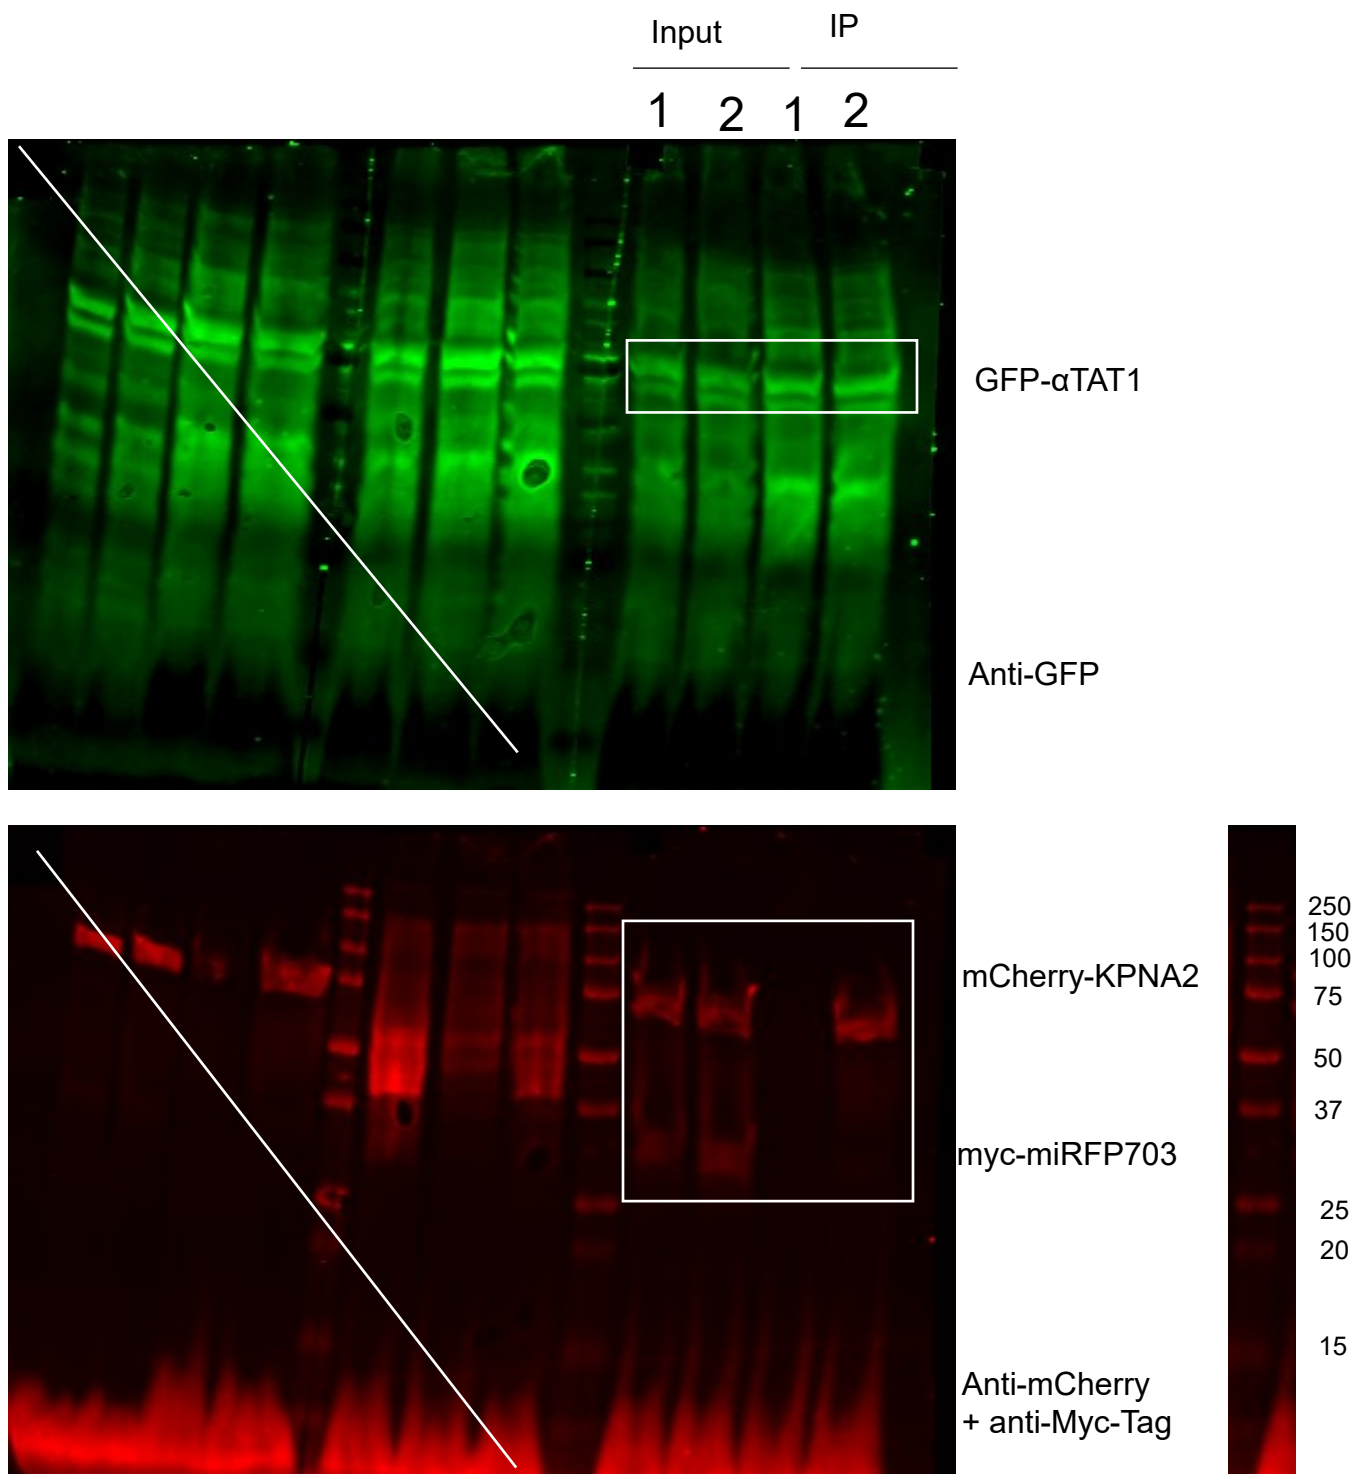

Full blot for Figure 6j. Parts of the blot used in Fig.6j are shown in white boxes. Input 1: HEK cells transfected with GFP- $\alpha$ TAT1 + myc-miRFP703 + mCherry-KPNA2, Input 2: HEK cells transfected with GFP- $\alpha$ TAT1 + myc-miRFP703-P2A-Difopein + mCherry-KPNA2
