# Supplementary figures and images for: Non-catalytic allostery in α-TAT1 by a phospho-switch drives dynamic microtubule acetylation
Source: PubMed Central journal article supplement — J Cell Biol. 2022 Oct 12;221(11):e202202100. doi: 10.1083/jcb.202202100 (PMC9565784; doi:10.1083/jcb.202202100), 2022-10-12

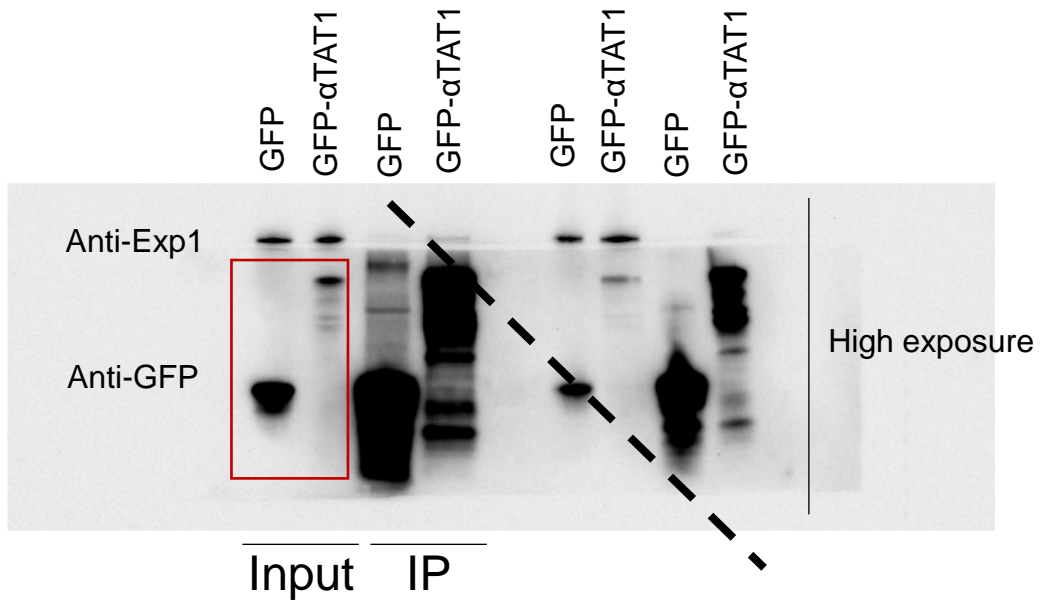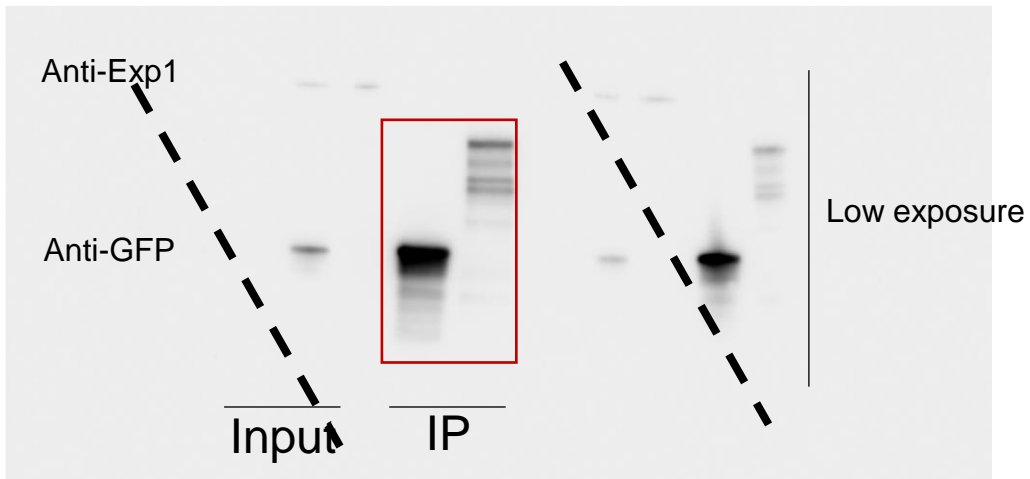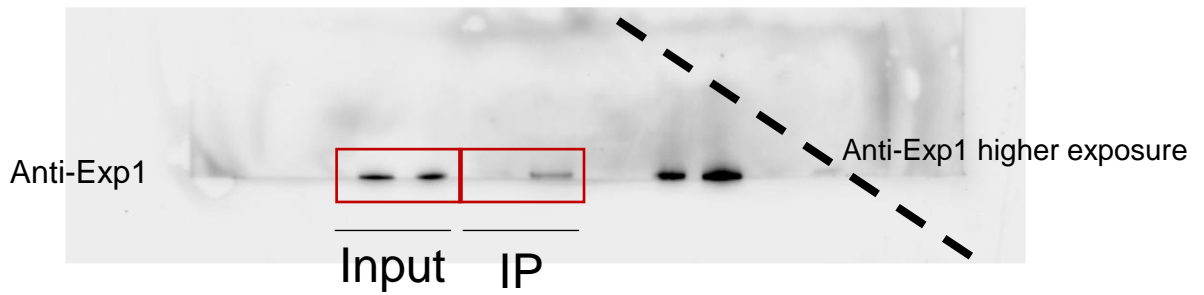

Full blot for Figure 2a. Parts of the blot used in Fig.2a are shown in red boxes.

Supplement: JCB_202202100_SourceDataF2.pdf [file JCB_202202100_SourceDataF2.pdf]

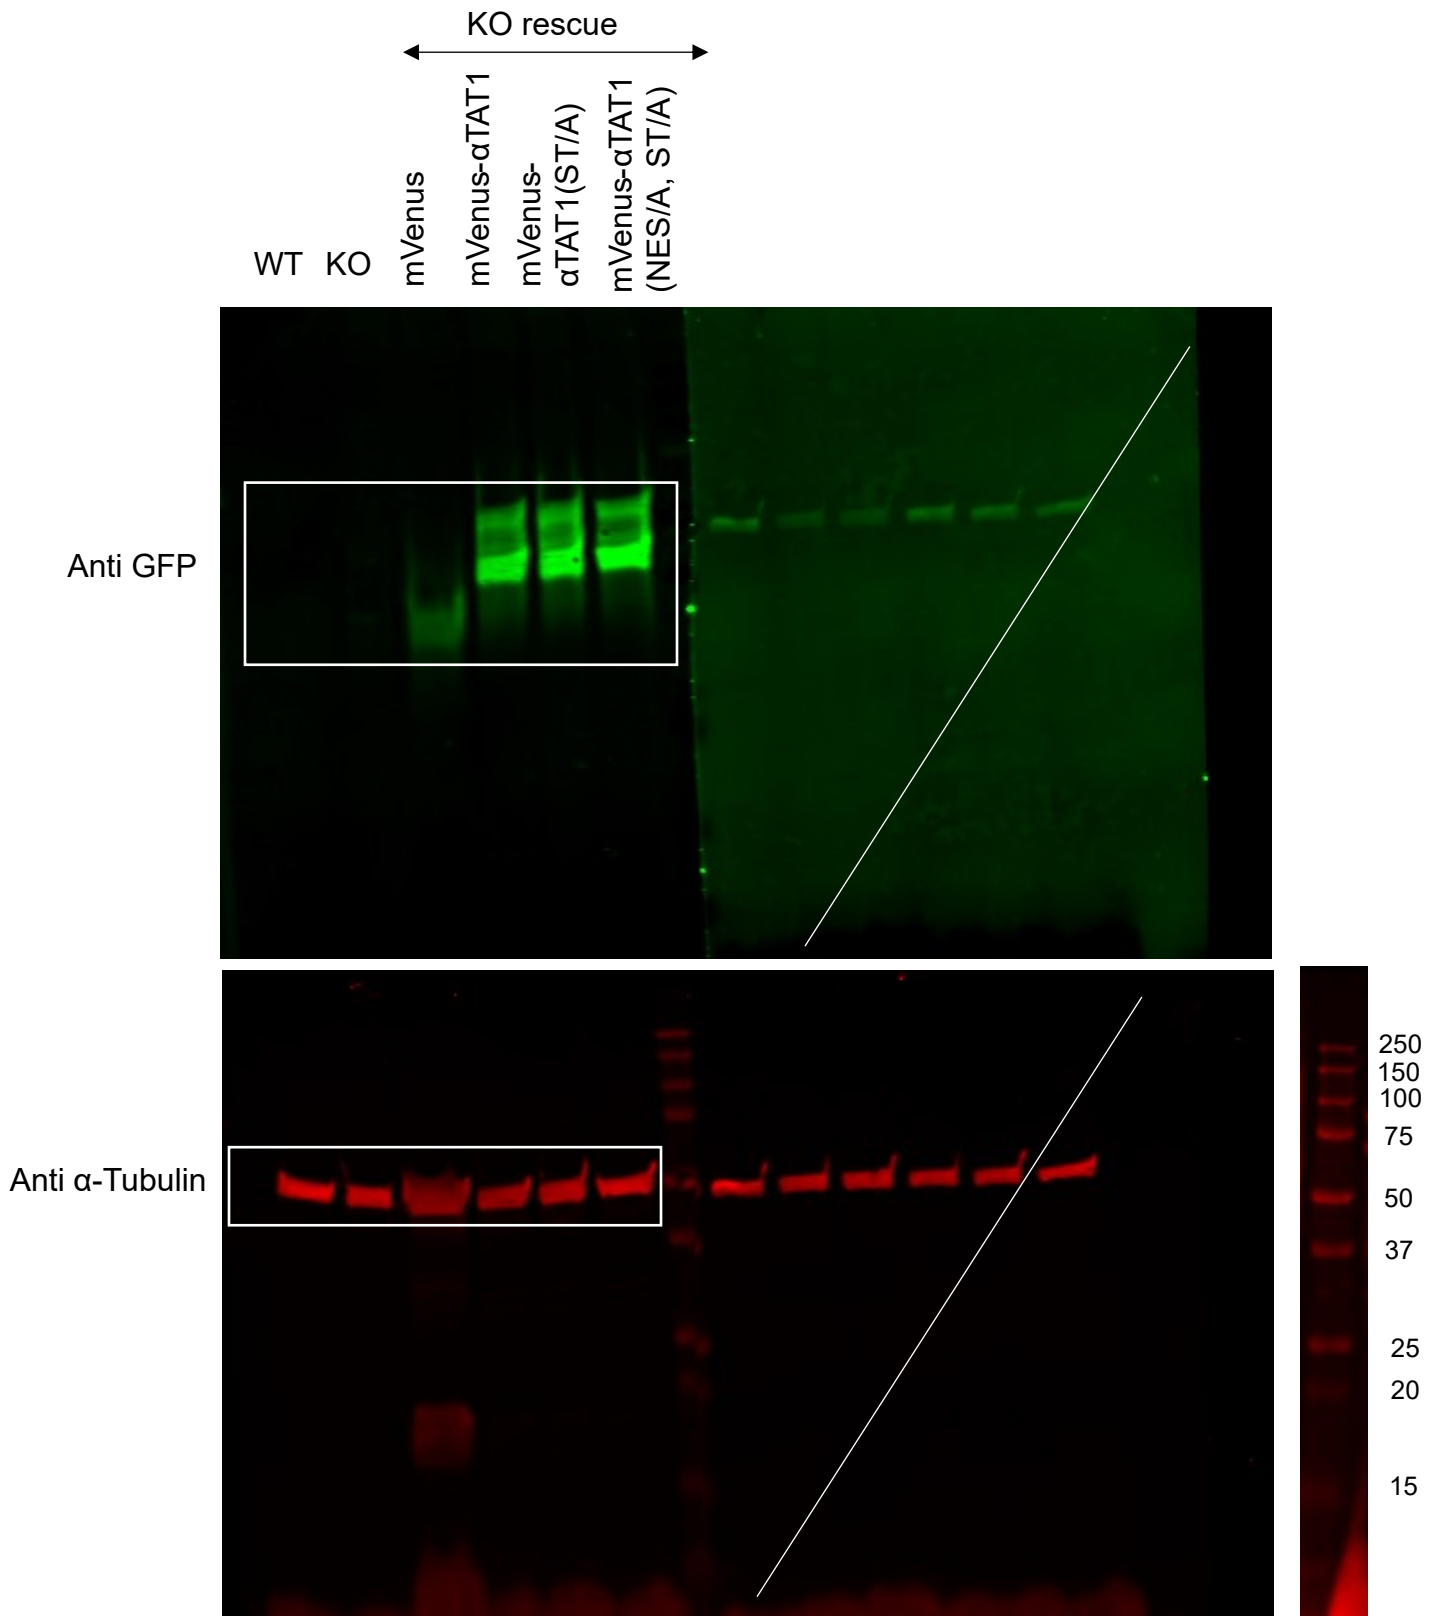

Supplement: JCB_202202100_SourceDataFS3.pdf [file JCB_202202100_SourceDataFS3.pdf]

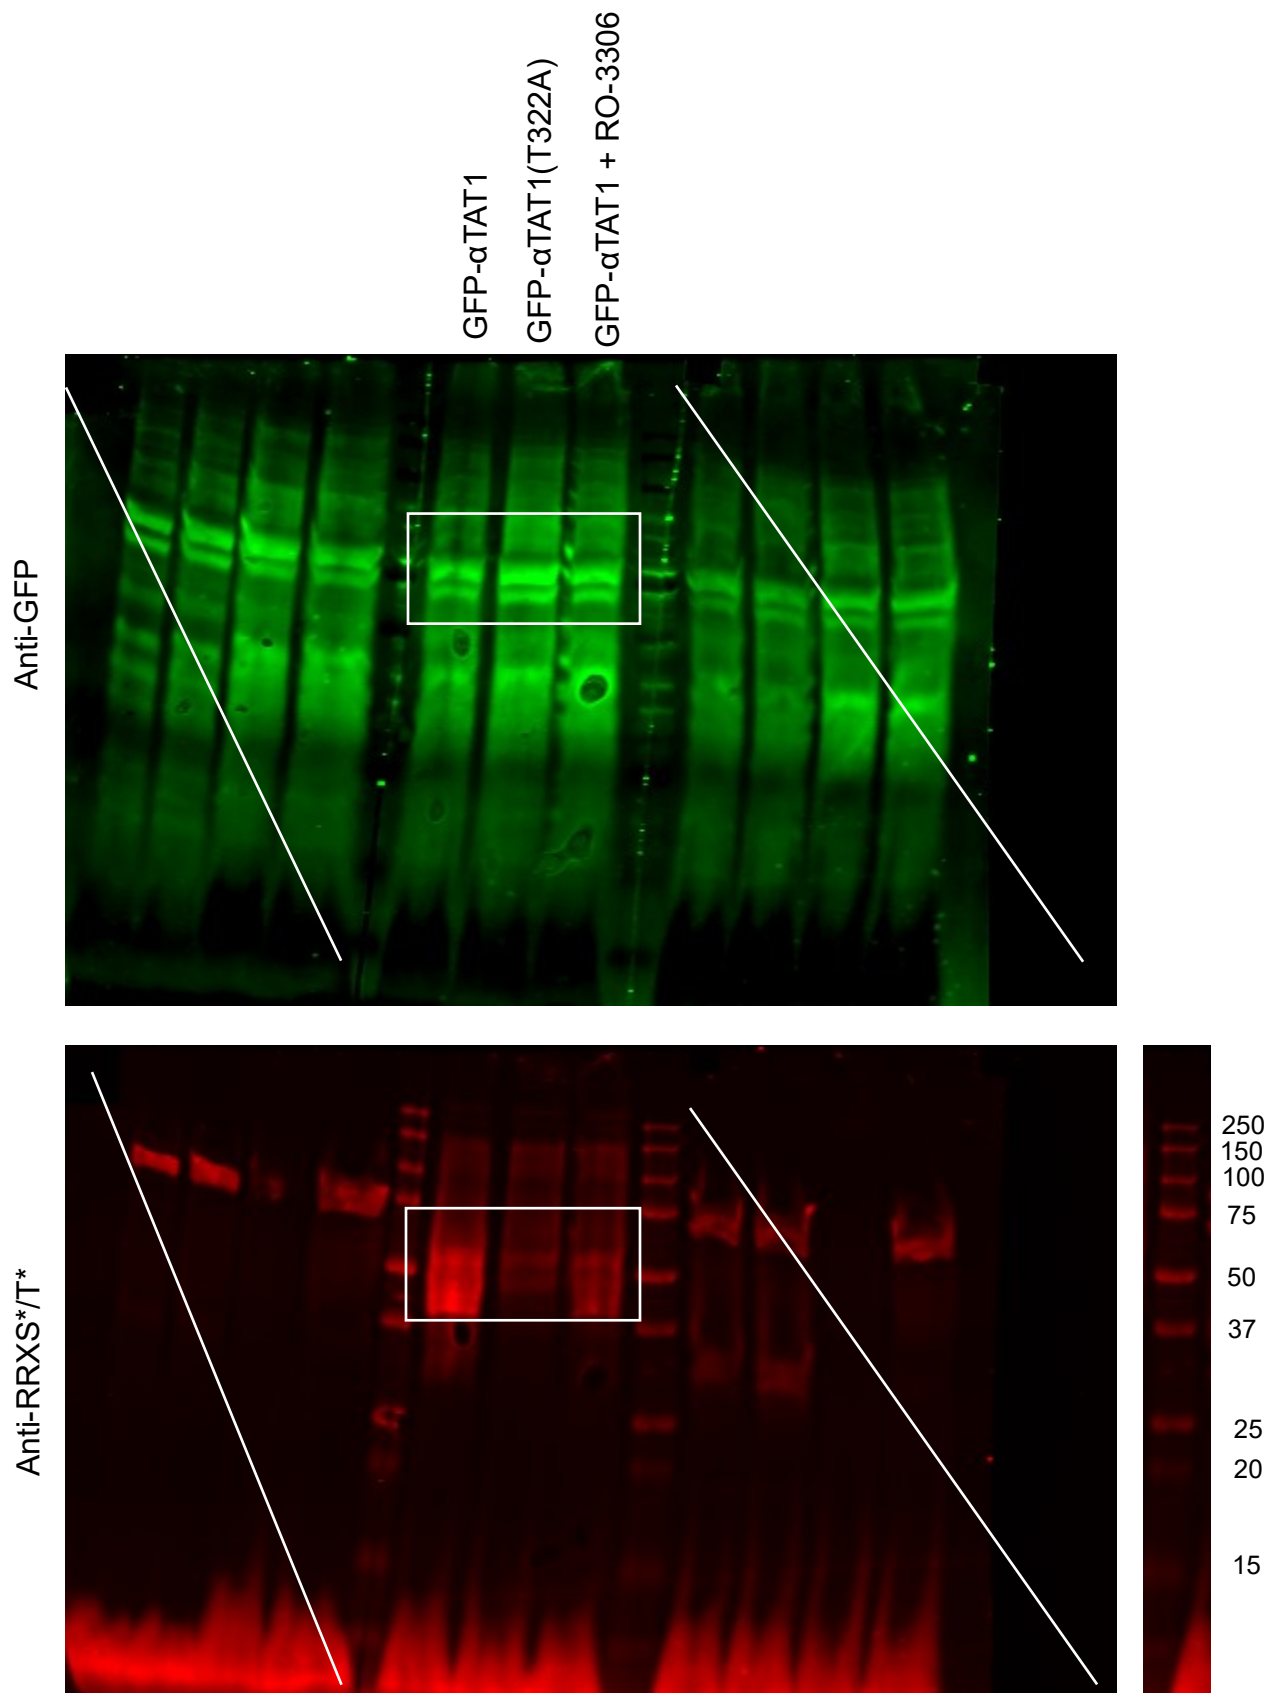

Full blot for Figure S4f. Parts of the blot used in Fig.S4f are shown in white boxes.

Supplement: JCB_202202100_SourceDataFS4.pdf [file JCB_202202100_SourceDataFS4.pdf]
